# Supplementary material for: Mokko Lactone Attenuates Doxorubicin-Induced Hepatotoxicity in Rats: Emphasis on Sirt-1/FOXO1/NF-κB Axis
Source: MDPI journal article supplement (doi:10.3390/nu13114142), 2021-11-19
Supplement: s1 [file s1]

# Mokko Lactone Attenuates Doxorubicin-Induced Hepatotoxicity in Rats: Emphasis on Sirt-1/FOXO1/NF- $\kappa$ B Axis

Alaa Sirwi <sup>1</sup>, Rasheed A. Shaik <sup>2</sup>, Abdulmohsin J. Alamoudi <sup>2</sup>, Basma G. Eid <sup>2</sup>,  
Ahmed K. Kammoun <sup>3</sup>, Sabrin R. M. Ibrahim <sup>4,5</sup>, Gamal A. Mohamed <sup>1,6</sup>,  
Hossam M. Abdallah <sup>1,7</sup> and Ashraf B. Abdel-Naim <sup>2,\*</sup>

<sup>1</sup> Department of Natural Products, Faculty of Pharmacy, King Abdulaziz University, Jeddah 21589, Saudi Arabia; asirwi@kau.edu.sa (A.S.); gahussein@kau.edu.sa (G.A.M.); hmafifi@kau.edu.sa (H.M.A.)

<sup>2</sup> Department of Pharmacology and Toxicology, Faculty of Pharmacy, King Abdulaziz University, Jeddah 21589, Saudi Arabia; rashaikh1@kau.edu.sa (R.A.S.); ajmalamoudi@kau.edu.sa (A.J.A.); beid@kau.edu.sa (B.G.E.)

<sup>3</sup> Department of Pharmaceutical Chemistry, Faculty of Pharmacy, King Abdulaziz University, Jeddah 21589, Saudi Arabia; akammoun@kau.edu.sa

<sup>4</sup> Batterjee Medical College, Preparatory Year Program, Jeddah 21442, Saudi Arabia; sabrin.ibrahim@bmc.edu.sa

<sup>5</sup> Department of Pharmacognosy, Faculty of Pharmacy, Assiut University, Assiut 71526, Egypt

<sup>6</sup> Department of Pharmacognosy, Faculty of Pharmacy, Al-Azhar University, Assiut Branch, Assiut 71524, Egypt

<sup>7</sup> Department of Pharmacognosy, Faculty of Pharmacy, Cairo University, Cairo 11562, Egypt

\* Correspondence: aaabdulrahman1@kau.edu.sa

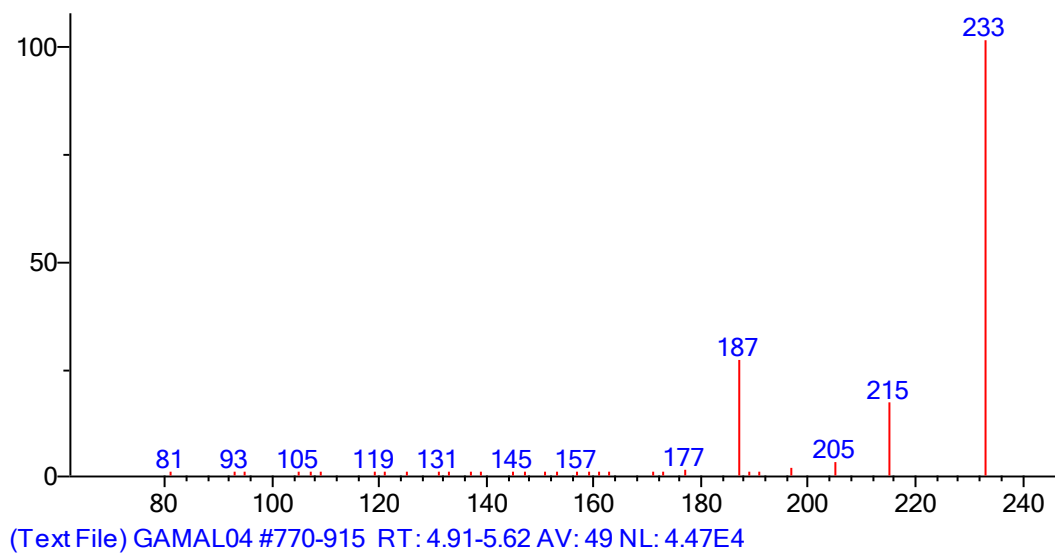

**Figure S1.** ESIMS of mokko lactone.

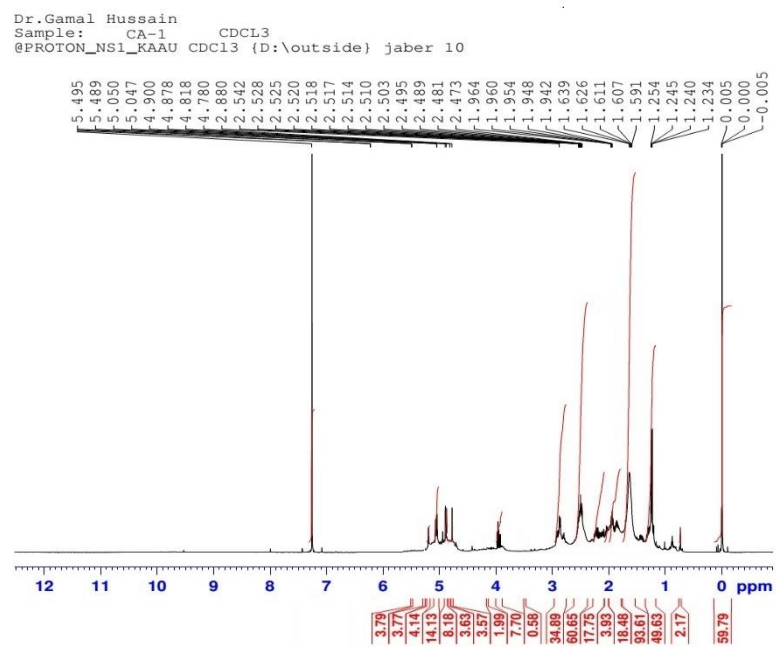

**Figure S2.**  $^1\text{H}$  NMR spectrum of mokko lactone in  $\text{CDCl}_3$  (600 MHz).

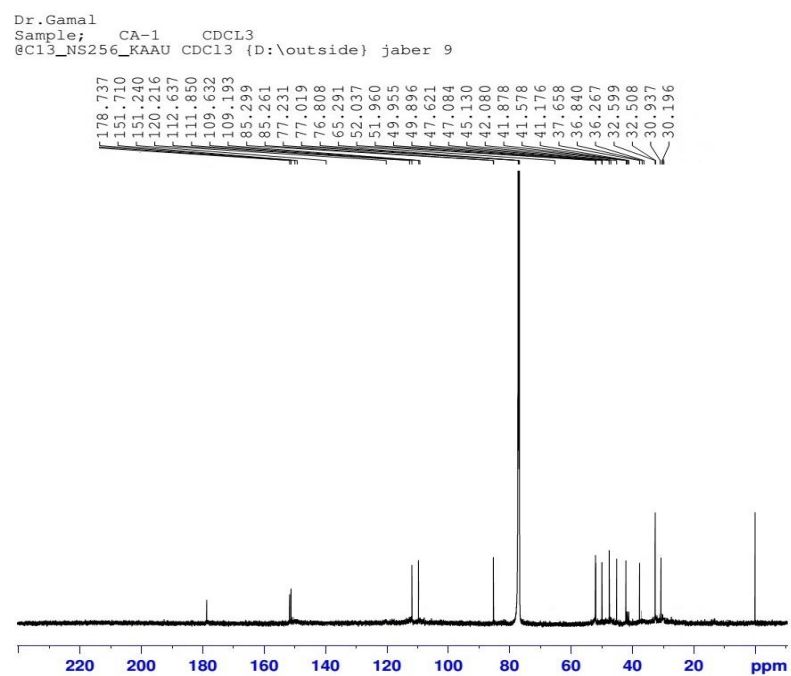

**Figure S3.** <sup>13</sup>C NMR spectrum of mokko lactone in CDCl<sub>3</sub> (150 MHz).
